# Supplementary material for: The Impact of Head Position on Neurological and Histopathological Outcome Following Controlled Automated Reperfusion of the Whole Body (CARL) in a Pig Model
Source: MDPI journal article supplement (doi:10.3390/jcm12227054), 2023-11-13
Supplement: s1 [file s1]

## Supplement 2

### Supplementary information

#### Calculations for Fig. 2

Linear mixed-effects model fit by maximum likelihood

Data: nds\_

|  | AIC      | BIC      | logLik    |
|--|----------|----------|-----------|
|  | 2373.887 | 2394.696 | -1180.944 |

Random effects:

Formula: ~1 | pig

(Intercept) Residual

StdDev: 29.8529 29.91607

Fixed effects: nds ~ tag \* HeadPos

|             | Value    | Std.Error | DF  | t-value   | p-value |
|-------------|----------|-----------|-----|-----------|---------|
| (Intercept) | 28.22325 | 18.685605 | 191 | 1.510427  | 0.1326  |
| tag         | -5.20671 | 3.209175  | 191 | -1.622445 | 0.1064  |
| HeadPos     | 54.83227 | 12.558013 | 42  | 4.366318  | 0.0001  |
| tag:HeadPos | -6.40365 | 2.391413  | 191 | -2.677768 | 0.0081  |

Correlation:

|             | (Intr) | tag    | HeadPs |
|-------------|--------|--------|--------|
| tag         |        | -0.573 |        |
| HeadPos     |        | -0.944 | 0.569  |
| tag:HeadPos | 0.513  | -0.944 | -0.574 |

Standardized Within-Group Residuals:

|  | Min         | Q1          | Med         | Q3         | Max        |
|--|-------------|-------------|-------------|------------|------------|
|  | -1.75505254 | -0.60991388 | -0.09954739 | 0.48872150 | 4.70809149 |

Number of Observations: 237

Number of Groups: 44

#### Calculations for Tab 2

Kruskal-Wallis rank sum test

data: HbStart by HeadPos

Kruskal-Wallis chi-squared = 0.00014071, df = 1, p-value = 0.9905

Kruskal-Wallis rank sum test

data: NaPriming by HeadPos

Kruskal-Wallis chi-squared = 0.038805, df = 1, p-value = 0.8438

Kruskal-Wallis rank sum test

data: OsmPriming by HeadPos

Kruskal-Wallis chi-squared = 8.8101, df = 1, p-value = 0.002996
