# Supplementary material for: The Impact of Head Position on Neurological and Histopathological Outcome Following Controlled Automated Reperfusion of the Whole Body (CARL) in a Pig Model
Source: MDPI journal article supplement (doi:10.3390/jcm12227054), 2023-11-13
Supplement: s1 [file s1]

*Supplement 2*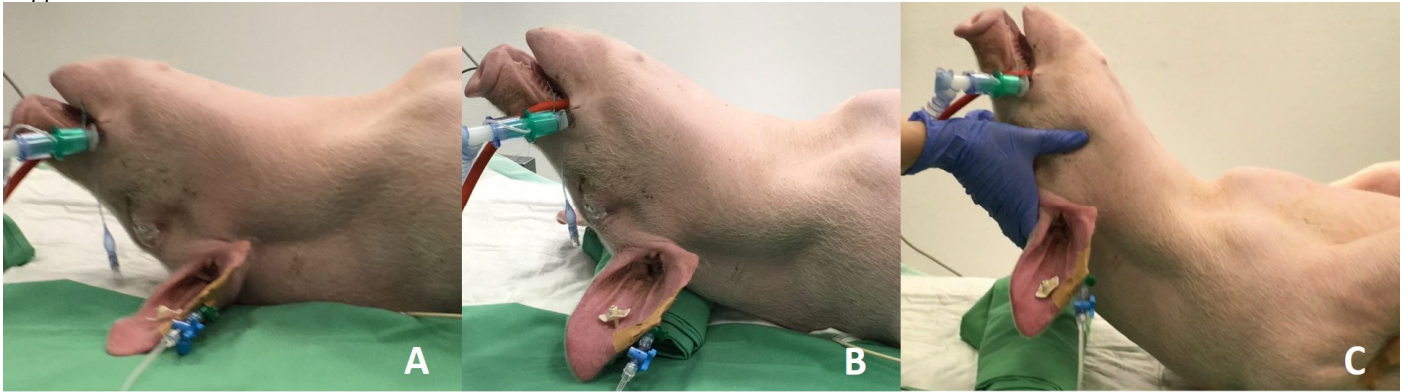

**Supplementary Figure S1:** Head positioning in the pig during the experiment. Panel A: Flat supine. Panel B: Head elevation using towel roll. Panel C: Additional manual inclination with further elevation. The inclination was performed intermittently.
